# Supplementary material
Source: HighWire-hosted journal article supplement (https://jnm.snmjournals.org/highwire/filestream/94634/field_highwire_adjunct_files/0/145300_Supplemental_Data.pdf)
Supplement: 145300_Supplemental_Data.pdf [file 145300_Supplemental_Data.pdf]

## Supplemental Materials

### Case No. 1

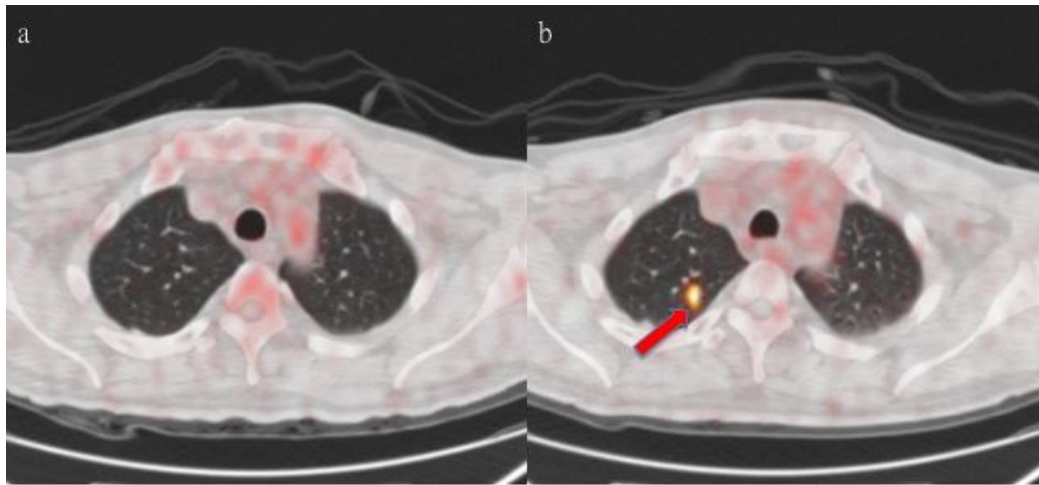

47-year-old male patient with left buccal cancer (pT4aN2bM0)

- a) June 30, 2009. Second PET scan one month after surgery: score 0 (distant site)
- b) November 13, 2009. Follow-up PET imaging performed at 3 months after CCRT: score 4 (right upper lung)

The right upper lung nodule was proven to be metastatic SCC by means of CT-guided biopsy.

Case No. 2

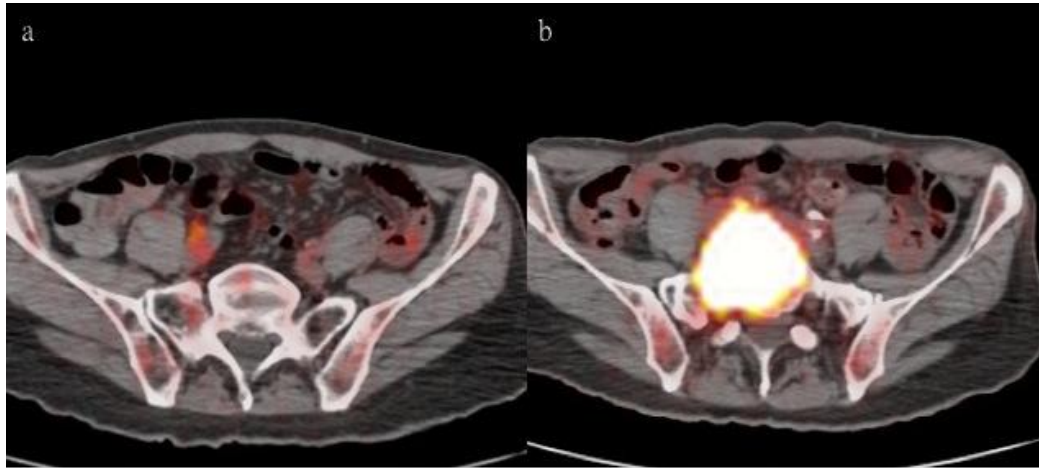

66-year-old male patient with left buccal cancer (pT3N2bM0)

- a) April 26, 2011. 2011/4/26 Second PET scan one month after surgery:  
score 0 (distant site)
- b) September 30, 2011. Follow-up PET imaging performed at 3 months after  
CCRT: score 4 (L5 spine)

The lesion located at the L5 spine level was proven to be metastatic SCC  
by means of excisional biopsy.

Case No. 4

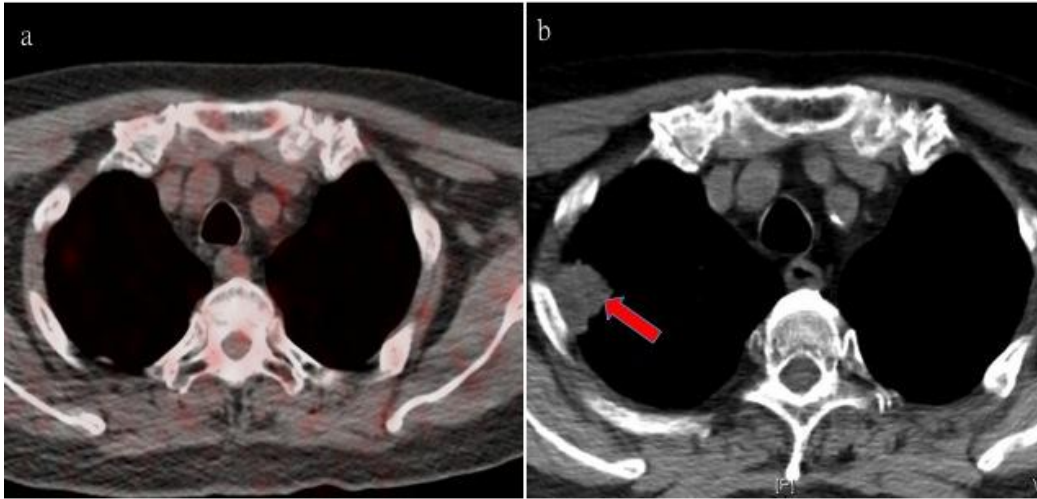

64-year-old male patient with left buccal cancer (pT4aN0M0)

- a) July 8, 2010. Second PET scan one month after surgery: score 0 (distant site)
- b) December 1, 2010. Follow-up CT imaging performed at another hospital at 3 months after CCRT: score 4 (right lung nodule with pleural attachment)

The right lung nodule was proven to be metastatic poorly differentiated carcinoma by means of core needle biopsy.

Case No. 5

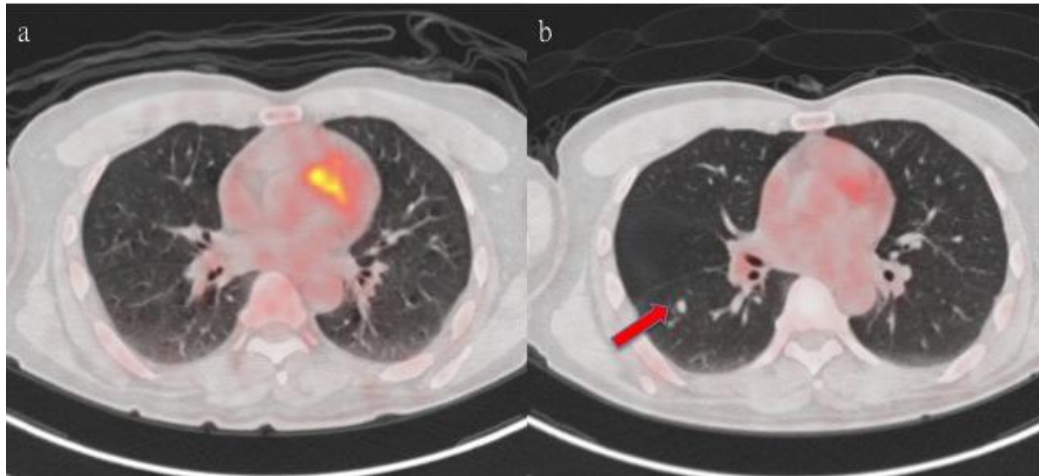

44-year-old male patient with left buccal cancer (pT2N1M0)

a) December 20, 2010. Second PET scan one month after surgery: score 0  
(distant site)

b) April 28, 2011. Follow-up PET imaging performed at 3 months after RT:  
score 3 (right lower lung small nodule)

The right lower lung nodule was proven to be metastatic SCC by means of  
wedge resection.

Case No. 6

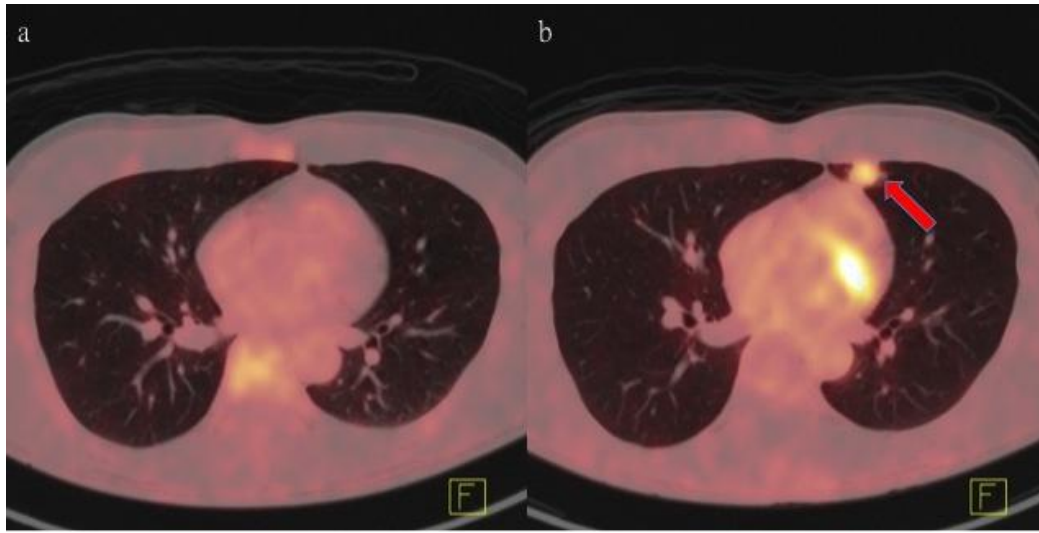

35-year-old male patient with right tongue cancer (pT2N2cM0)

- a) February 14, 2011. Second PET scan one month after surgery: score 0 (distant site)
- b) October 7, 2011. Follow-up PET imaging performed at 6 months after radiotherapy: score 4 (left lingual lung nodule)

The left lingual lung nodule was proven to be metastatic SCC by means of wedge resection.

Case No.7

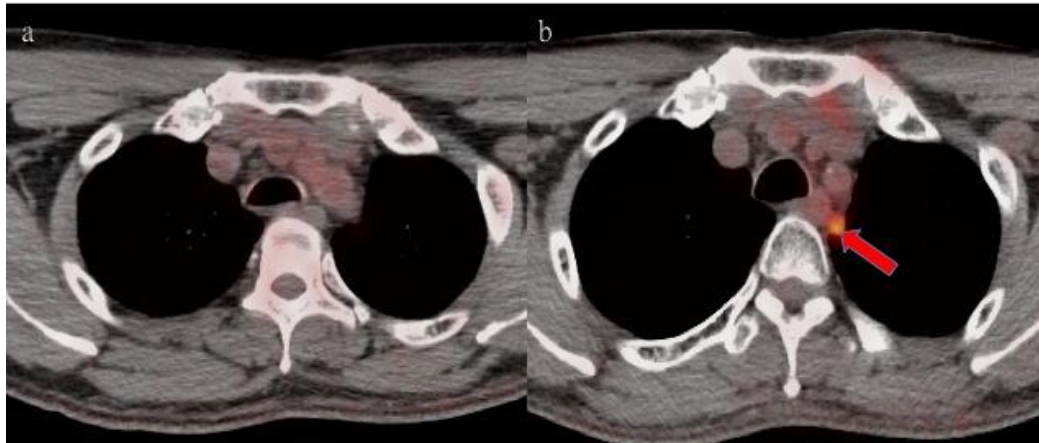

48-year-old male patient with left tongue cancer (pT2N2bM0)

- a) September 29, 2011. Second PET scan one month after surgery: score 0 (distant site)
- b) May 18, 2012. Follow-up PET imaging performed at 6 months after CCRT: score 4 (mediastinal lymph node)

The mediastinal lymph node was proven to be metastatic SCC by means of endoscopic ultrasound-guided fine-needle aspiration.

Case No. 8

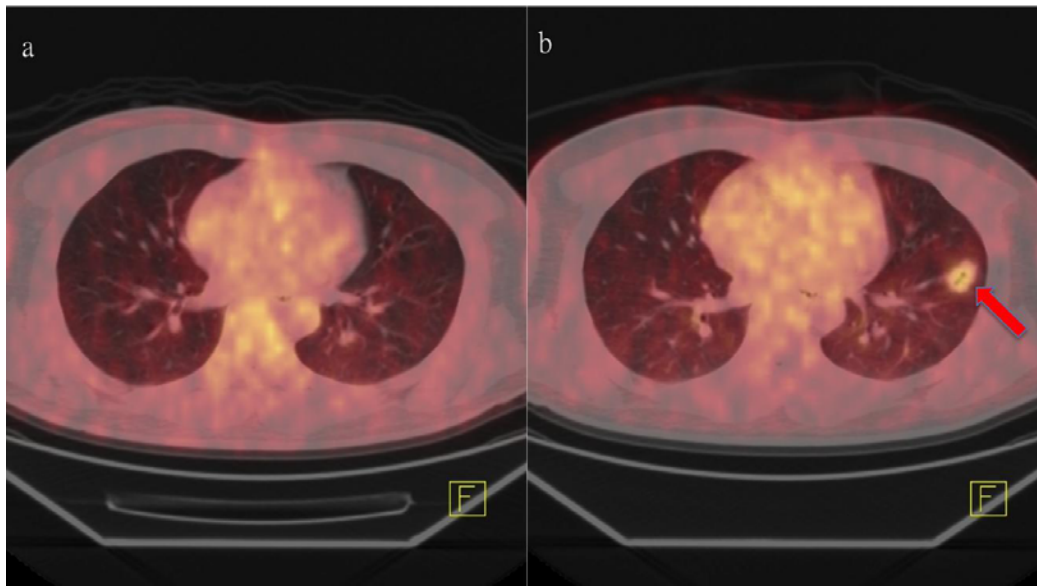

44-year-old male patient with right tongue cancer (pT1N1M0)

a) March 22, 2010. Second PET scan one month after surgery: score 0 (distant site)

b) August 9, 2010. Follow-up PET imaging performed at 3 months after CCRT: score 4 (left lung lobe cavitation)

The left lung lobe cavitation was proven to be metastatic SCC by means of CT-guided biopsy.

Case No. 10

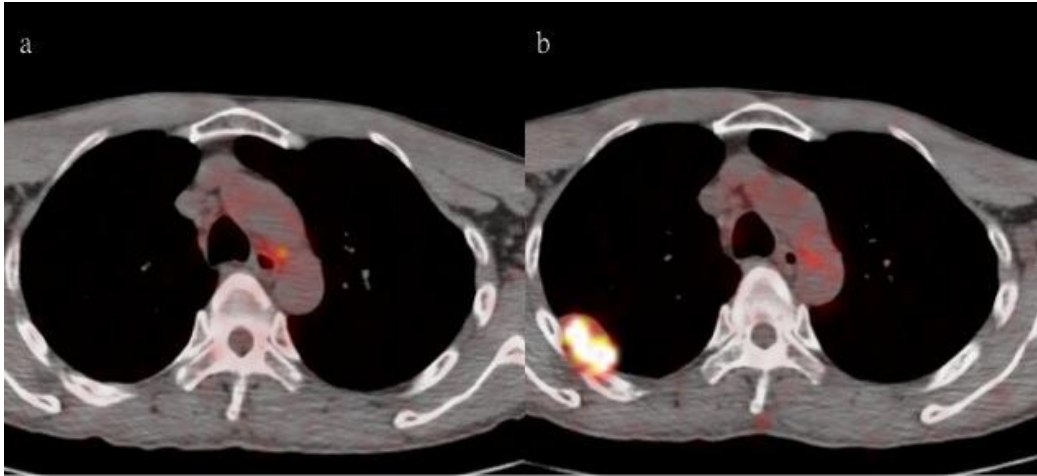

51-year-old male patient with right tongue cancer (pT2N2bM0)

a) August 9, 2011. Second PET scan one month after surgery: score 0 (distant site)

b) December 23, 2011. Follow-up PET imaging performed at 3 months after CCRT: score 4 (right upper lung pleural mass)

The right upper lung pleural mass was proven to be metastatic SCC by means of video-assisted thoracic surgery.

Case No. 11

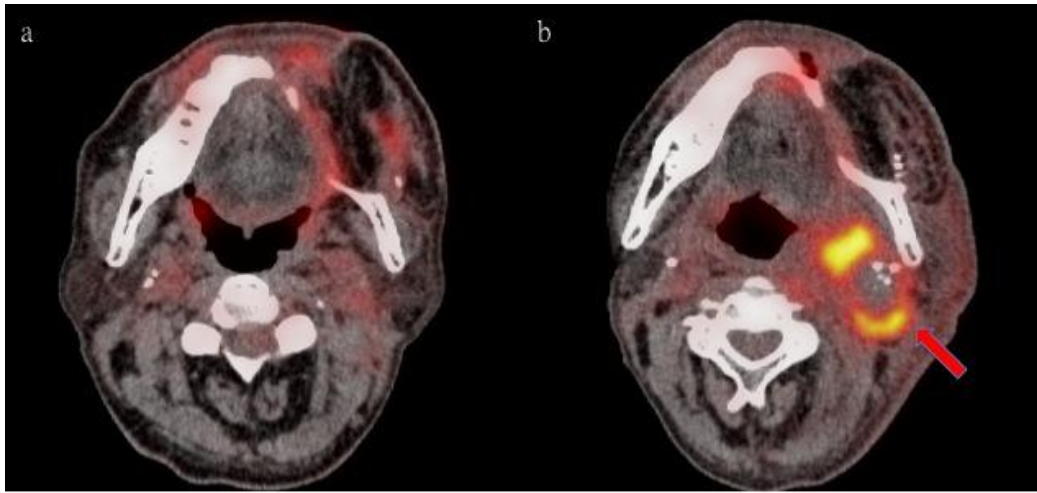

63-year-old male patient with left tongue cancer (pT2N2bM0)

a) December 26, 2011. Second PET scan one month after surgery: score 1 (local lesion)

b) May 14, 2012. Follow-up PET imaging performed at 3 months after RT: score 4 (left level-II lymph node with central necrosis)

The patient refused both treatment and further examinations; he died on June 8, 2012.

**SUPPLEMENTAL TABLE 1**

**Clinicopathologic Characteristics and Clinical Outcomes of the 15 OSCC Patients Experiencing Disease-Free Survival Events and who Showed Negative Findings on Pre-RT/CCRT PET/CT Imaging**

| Case No. | Primary cancer site | Primary staging | Pre-RT/CCRT PET/CT score* | Events                              | Time to events (months) | Treatment modality for recurrent disease  | Outcomes | Follow-up (months) |
|----------|---------------------|-----------------|---------------------------|-------------------------------------|-------------------------|-------------------------------------------|----------|--------------------|
| 1        | Left bucca          | pT4aN2bM0       | 1 (Local)                 | Lung (RUL)                          | 7                       | Palliative CT                             | DOD      | 13                 |
| 2        | Left bucca          | pT3N2bM0        | 1 (Local)                 | Bone (L5)                           | 7                       | Palliative CT                             | DOD      | 10                 |
| 3        | left tongue         | pT2N0M0         | 1 (Local)                 | LN (Left, level II, III)            | 37                      | Curative CCRT                             | NED      | 38                 |
| 4        | Left bucca          | pT4aN0M0        | 1 (Local)                 | Lung (RUL)                          | 7                       | Palliation                                | DOD      | 7                  |
| 5        | Left bucca          | pT2N1M0         | 1 (Local)                 | Lung (RLL)                          | 6                       | Palliative CT                             | DOD      | 13                 |
| 6        | Right tongue        | pT2N2cM0        | 1 (Local)                 | Lung (LLL)                          | 9                       | Palliative CT                             | DOD      | 16                 |
| 7        | left tongue         | pT2N2bM0        | 1 (Local)                 | Mediastinum                         | 10                      | Palliative CT                             | DOD      | 19                 |
| 8        | Right tongue        | pT1N1M0         | 1 (Local)                 | Lung (LLL)                          | 6                       | Palliative CT                             | DOD      | 10                 |
| 9        | Left bucca          | pT4aN2bM0       | 1 (Local)                 | Lung (LUL)                          | 13                      | Salvage surgery with lung wedge excision  | NED      | 41                 |
| 10       | Right tongue        | pT2N2bM0        | 1 (Local)                 | Right pleural                       | 6                       | Palliative CT                             | DOD      | 10                 |
| 11       | Left tongue         | pT2N2bM0        | 1 (Left, LN)              | LN (Left, level II)                 | 6                       | Patient refuse to treat                   | DOD      | 7                  |
| 12       | Left alveolar ridge | pT4aN0M0        | 1 (Local)                 | LN (Left, level I)                  | 12                      | Curative CCRT                             | DOD      | 21                 |
| 13       | Left alveolar ridge | pT4aN0M0        | 1 (Local)                 | Local, LN (Left, level II)          | 30                      | Salvage surgery followed by adjuvant CCRT | NED      | 43                 |
| 14       | Right               | pT4aN0M0        | 1 (Local)                 | 2 <sup>nd</sup> and 3 <sup>rd</sup> | 16                      | Salvage surgery alone                     | DOD      | 26                 |

| retromolar<br>trigone |             |         |           | primary<br>cancer** | (patient refuse adjuvant<br>treatment) |                                            |     |    |
|-----------------------|-------------|---------|-----------|---------------------|----------------------------------------|--------------------------------------------|-----|----|
| 15                    | Left tongue | pT1N0M0 | 1 (Local) | Local               | 24                                     | Salvage surgery followed<br>by adjuvant RT | NED | 27 |

\*PET/CT visual score

\*\*Died because of second and third primary cancers (left tongue and right tongue, synchronous tumor)

LN = lymph node; CT = chemotherapy; RT = radiotherapy; CCRT = concurrent chemoradiotherapy; NED = no evidence of disease; DOD = died of disease; RUL = right upper lobe; RLL = right lower lobe; LLL = left lower lobe; LUL = left upper lobe.
